# Supplementary material for: Integrated Metabolomics and Lipidomics Analysis Reveals Lipid Metabolic Disorder in NCM460 Cells Caused by Aflatoxin B1 and Aflatoxin M1 Alone and in Combination
Source: MDPI journal article supplement (doi:10.3390/toxins15040255), 2023-03-31
Supplement: s1 [file s1]

# Supplementary Materials: Integrated Metabolomics and Lipidomics Analysis Reveals Lipid Metabolic Disorder in NCM460 Cells Caused by Aflatoxin B1 and Aflatoxin M1 Alone and in Combination

Xue Yang, Xue Li, Yanan Gao, Jiaqi Wang and Nan Zheng

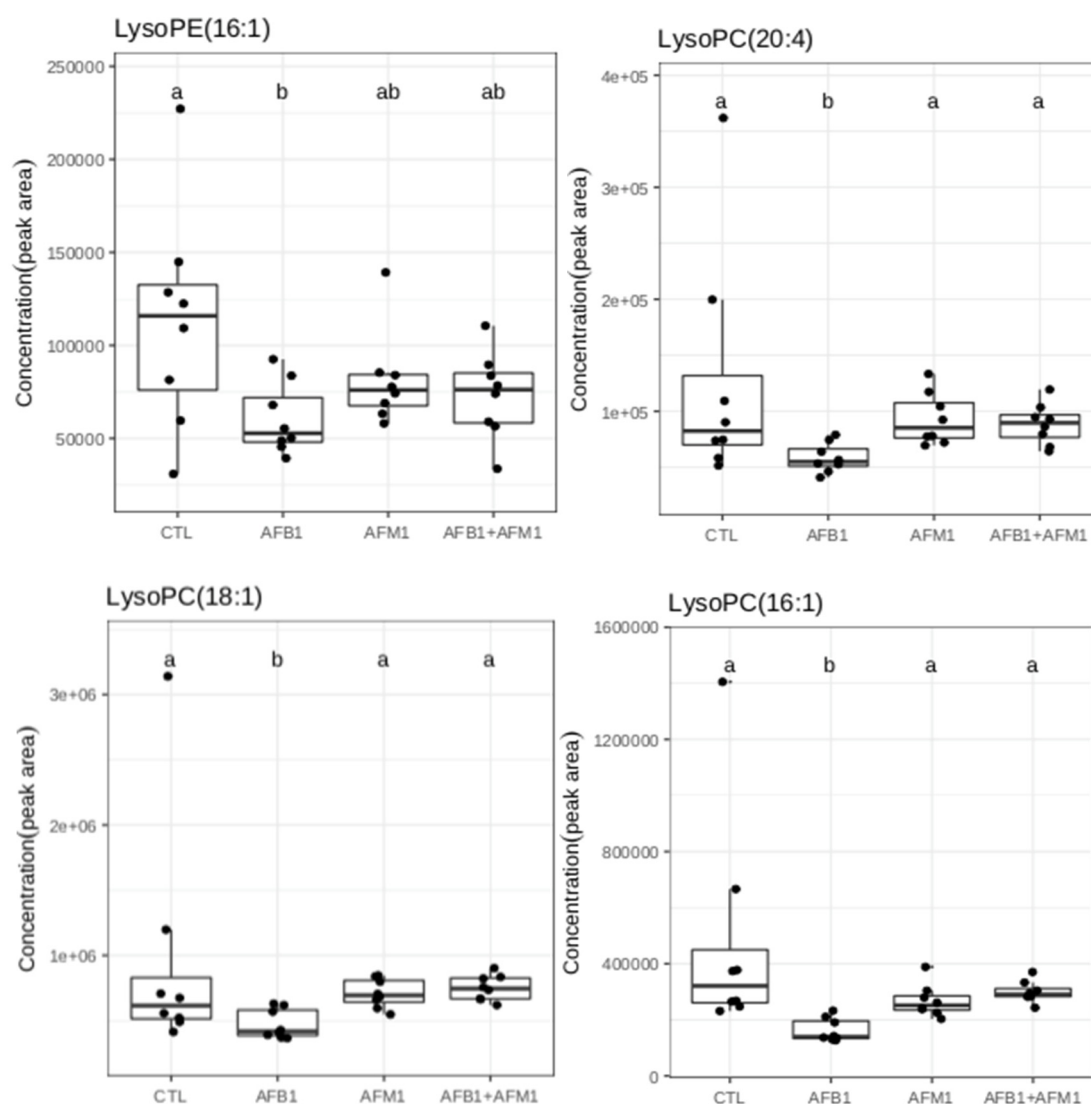

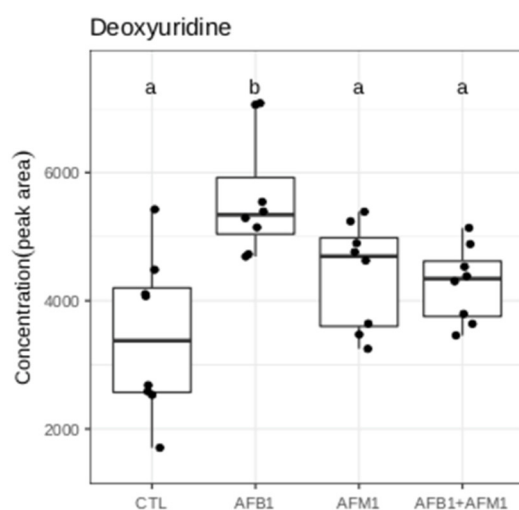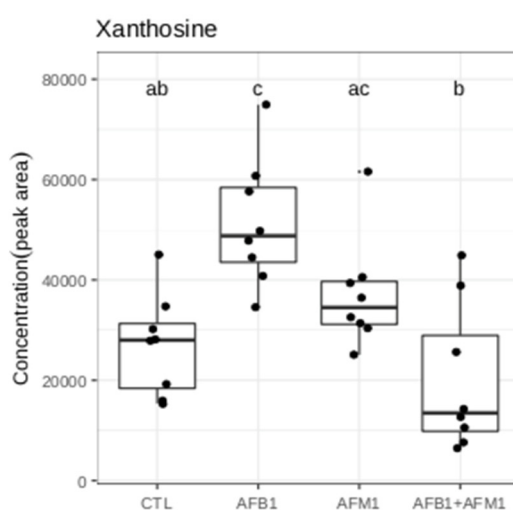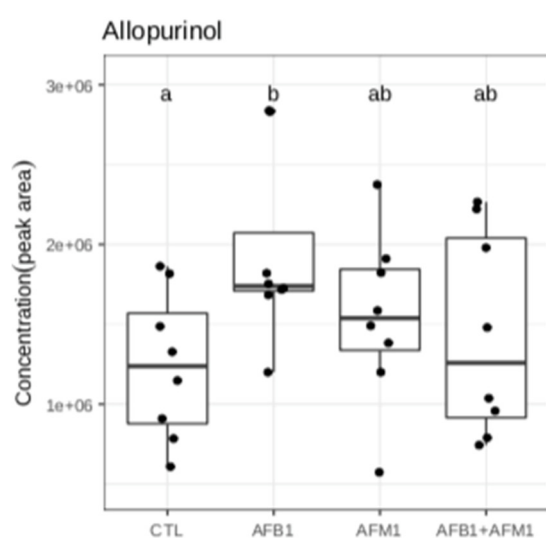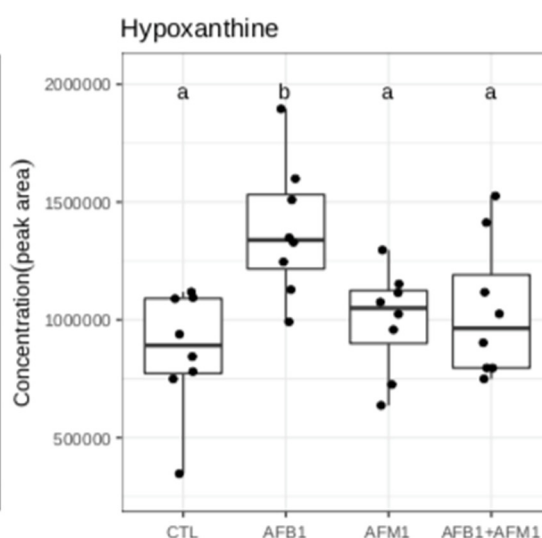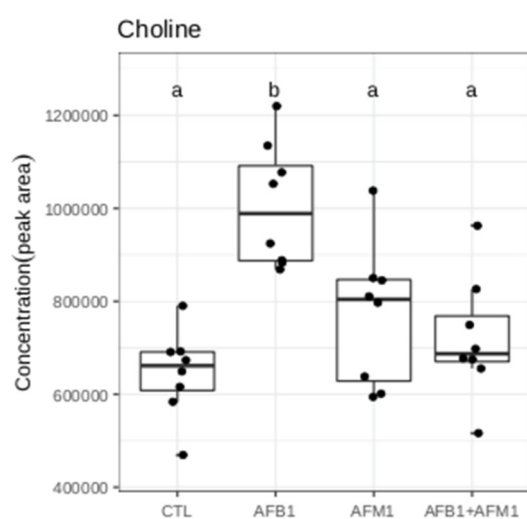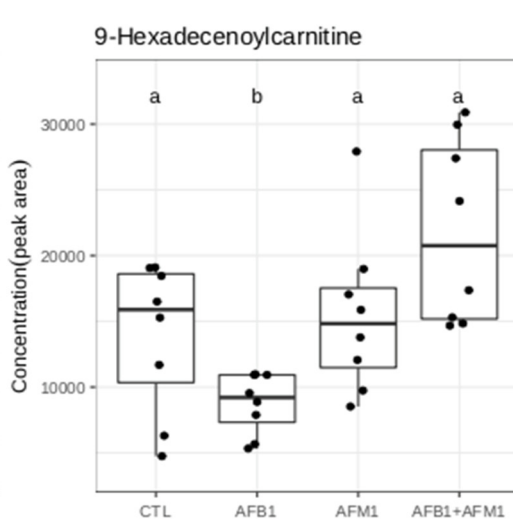

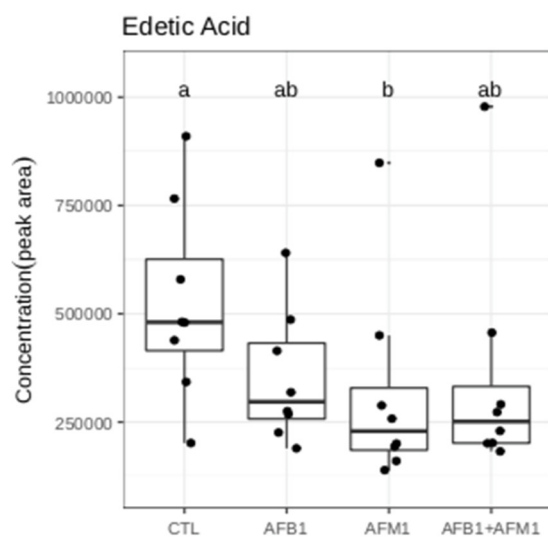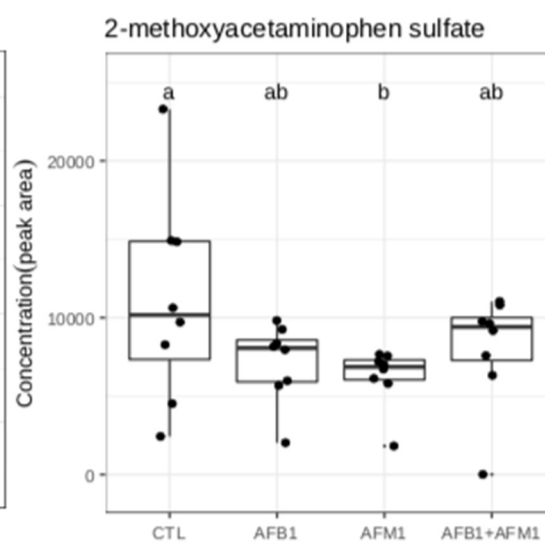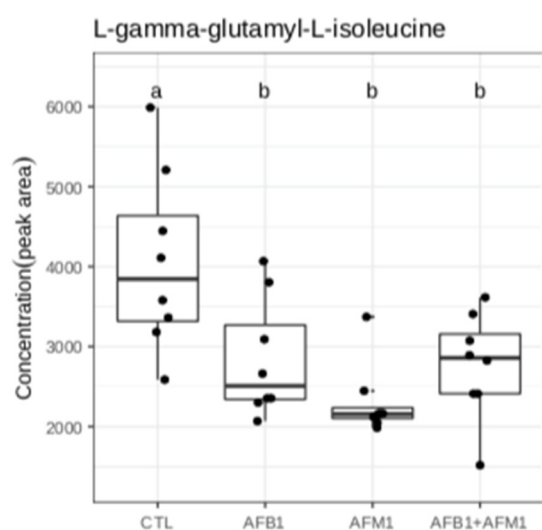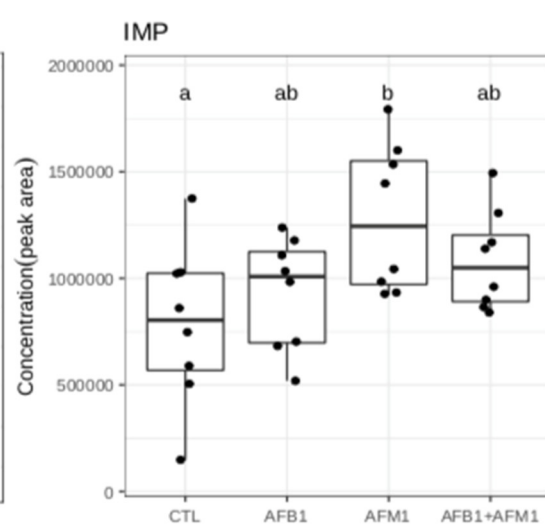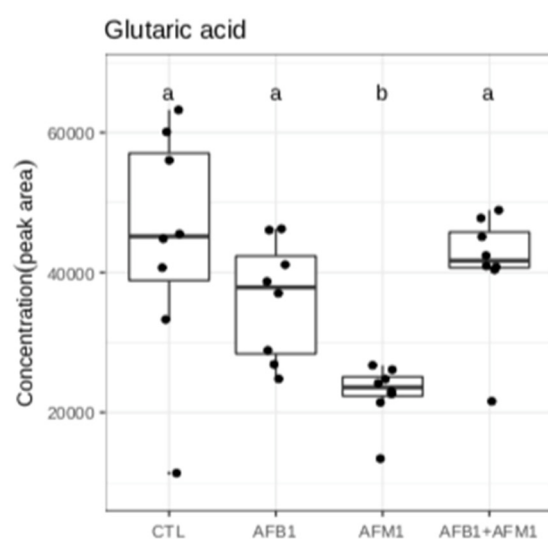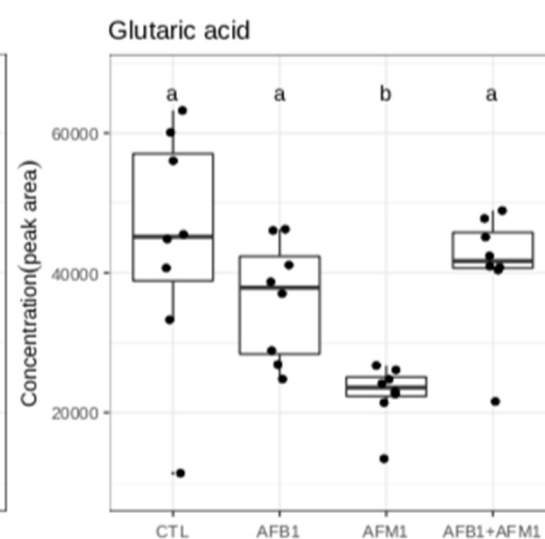

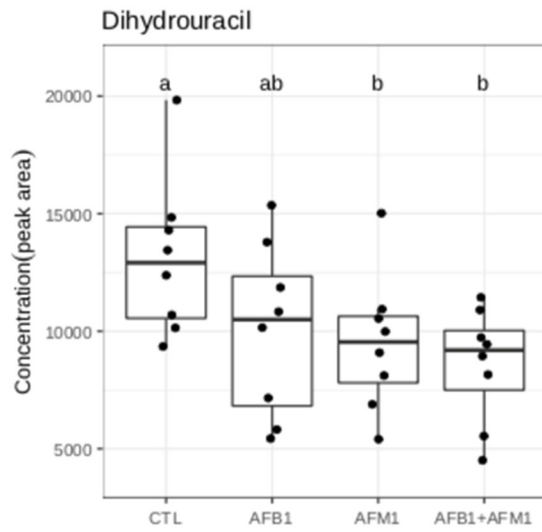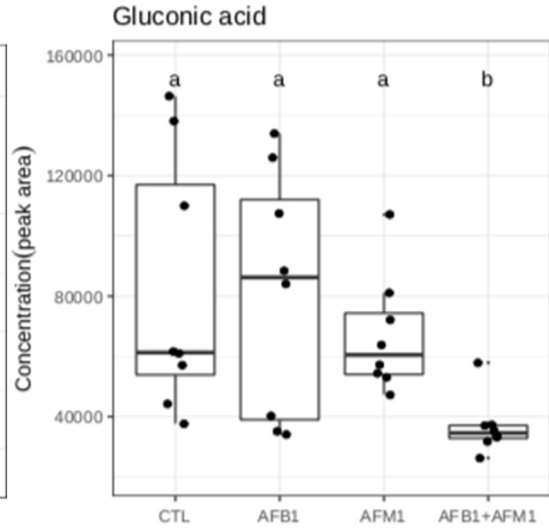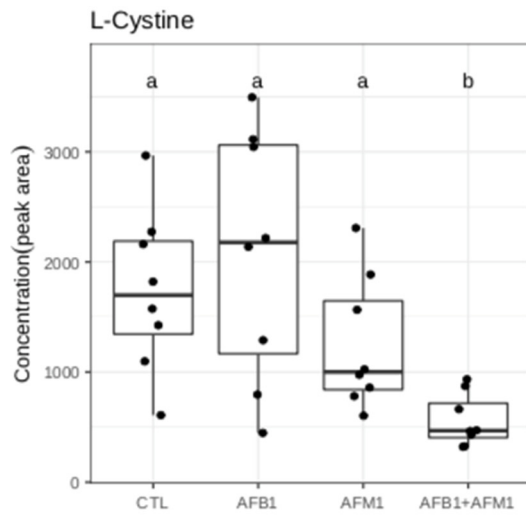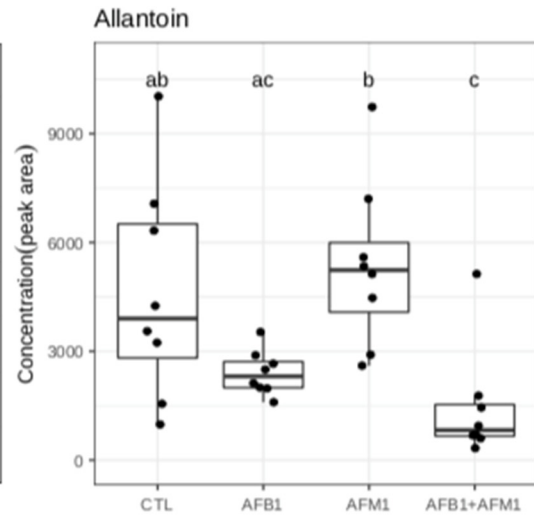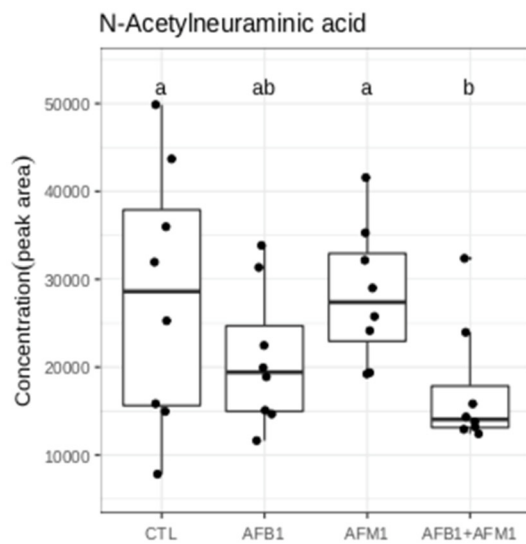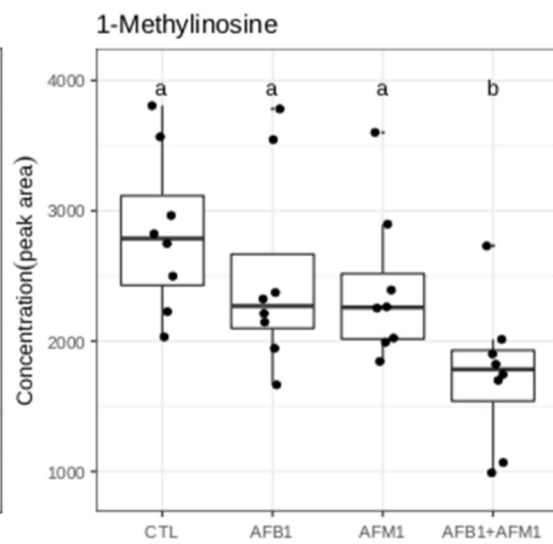

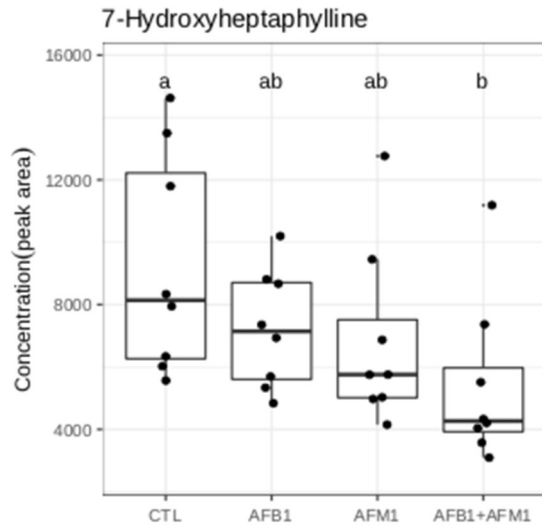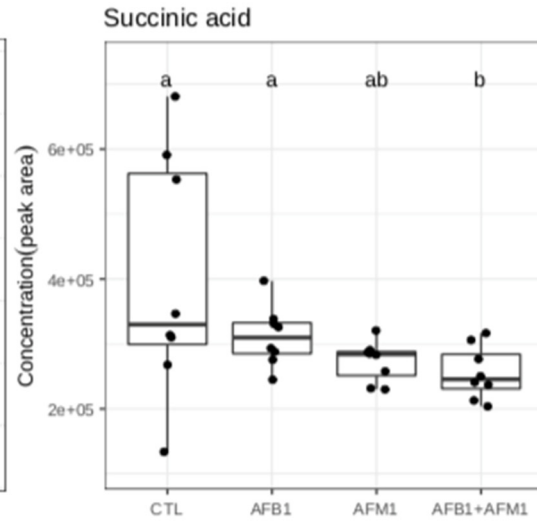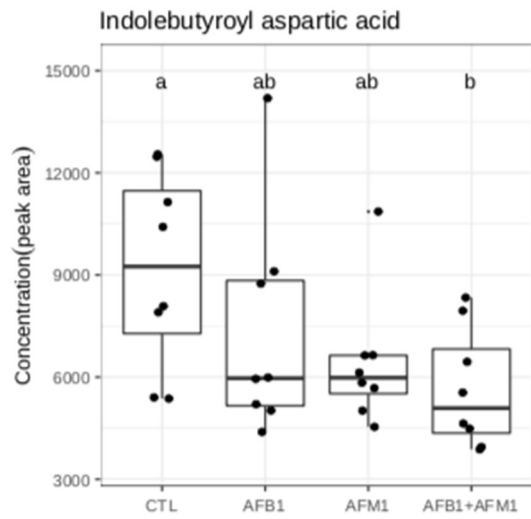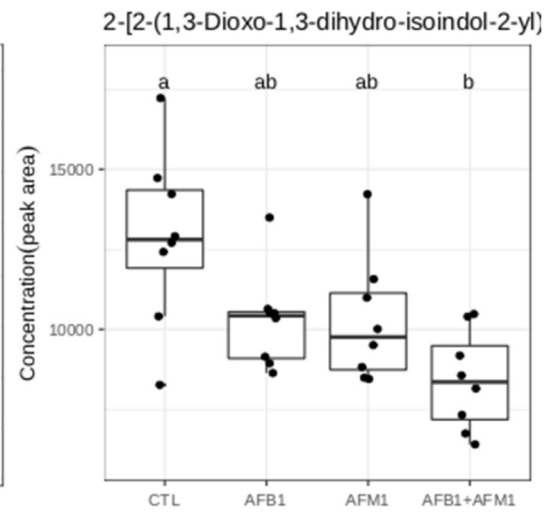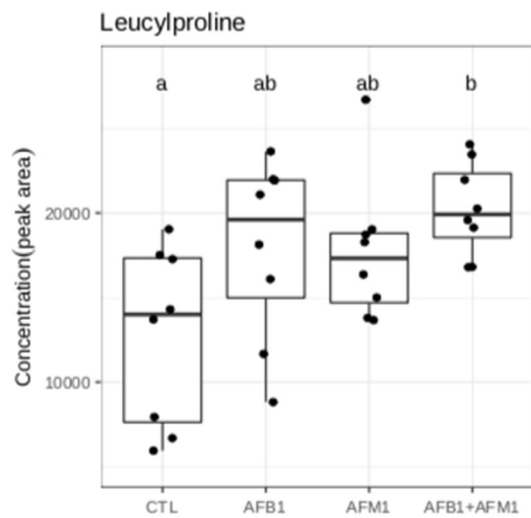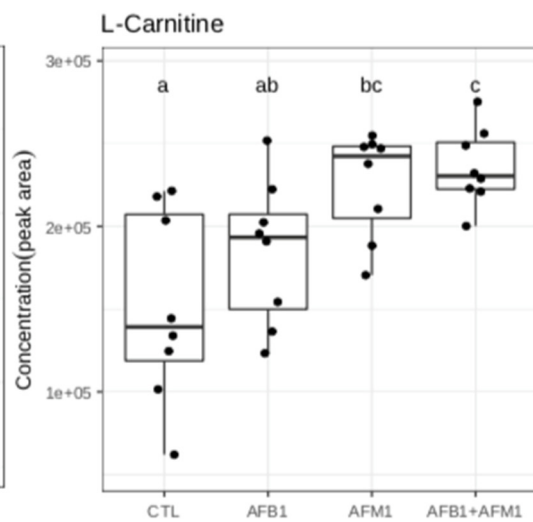

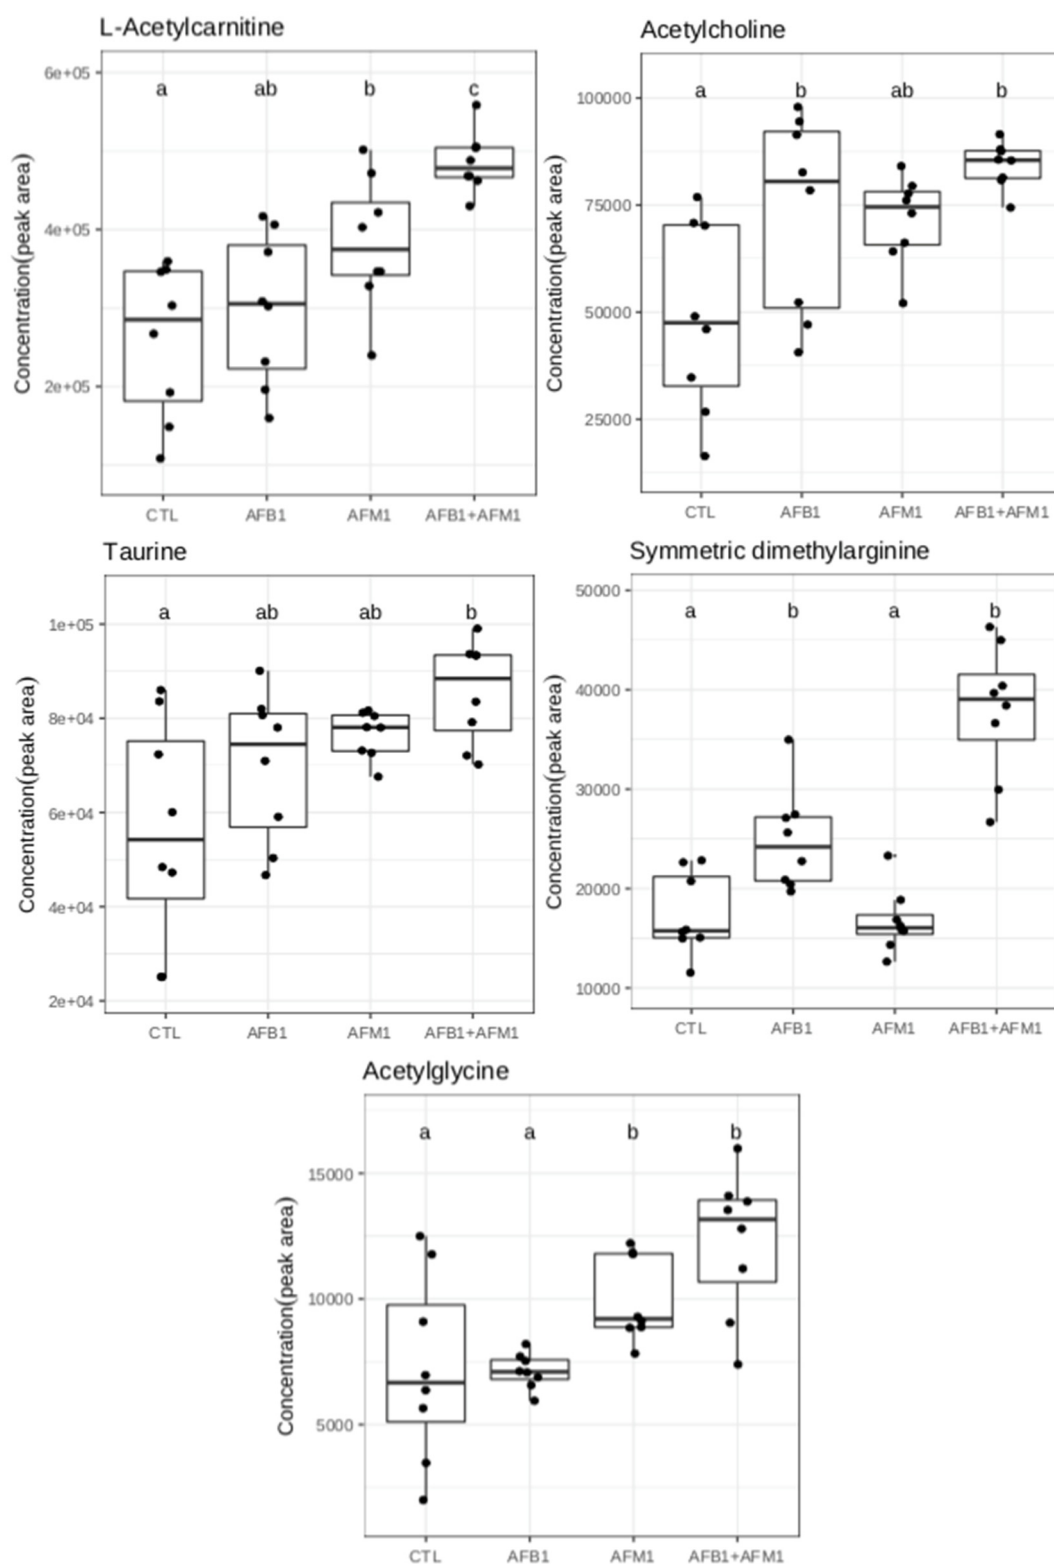

**Figure S1.** Boxplot further exhibited the level of each specific metabolites in different groups. Different letters (a-c) indicate significant differences ( $p < 0.05$ ).

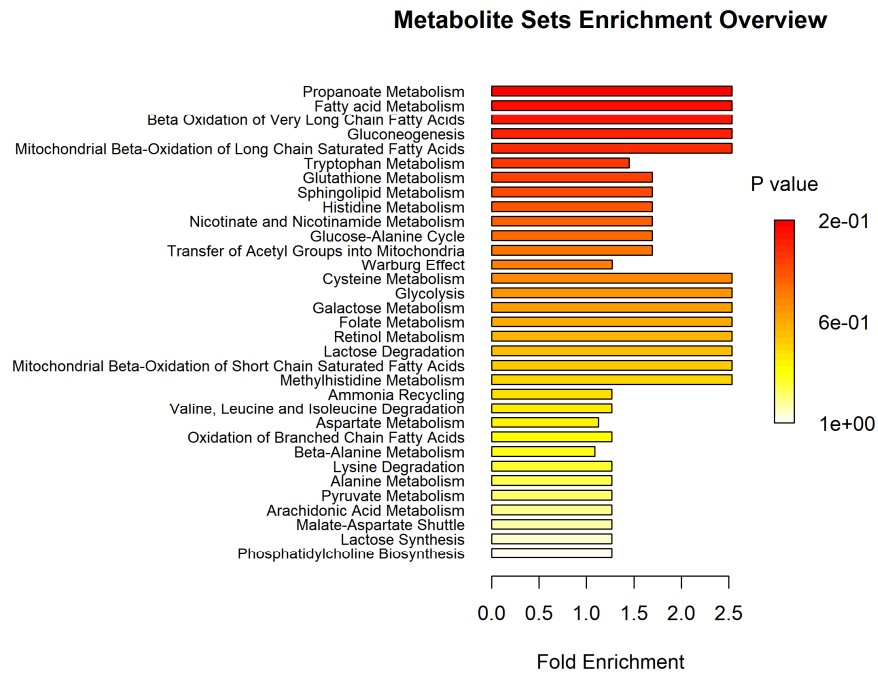

**Figure S2.** The metabolites sets enrichment analysis of differential expression metabolites in AFM1/CTL.
